# Supplementary material for: TGFβ signaling in germinal center B cells promotes the transition from light zone to dark zone
Source: PubMed Central journal article supplement — J Exp Med. 2019 Sep 10;216(11):2531–45. doi: 10.1084/jem.20181868 (PMC6829600; doi:10.1084/jem.20181868), 2019-09-10
Supplement: JEM_20181868_sm.pdf [file JEM_20181868_sm.pdf]

Supplemental material

Albright et al., <https://doi.org/10.1084/jem.20181868>

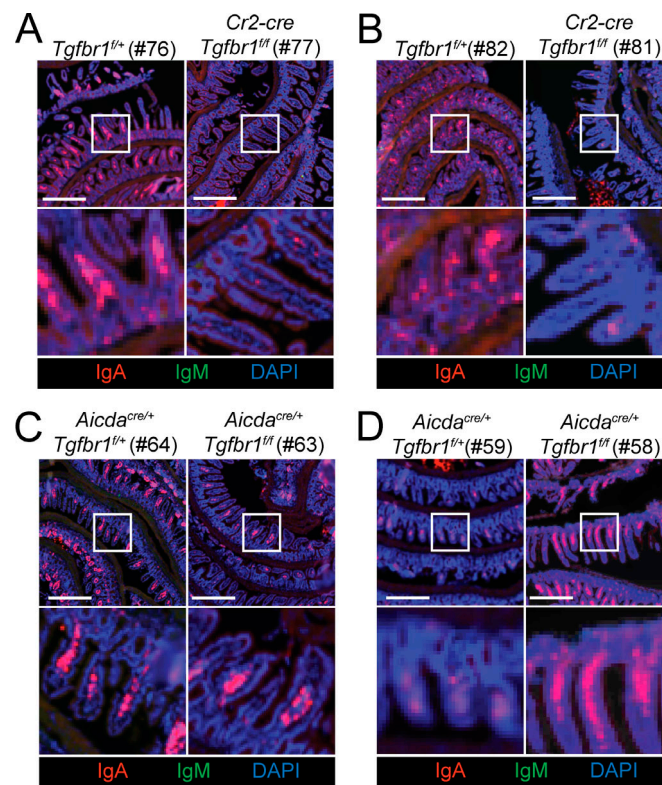

Figure S1. **Induction of IgA<sup>+</sup> plasma cells in small intestine lamina propria is not dependent on TGF $\beta$  signaling PP GCs.** (A–D) Additional examples of immunofluorescence of sections of small intestine from *Tgfb1<sup>+/+</sup>* or *Cr2-cre Tgfb1<sup>f/f</sup>* animals (A and B) or *Aicda<sup>cre/+</sup> Tgfb1<sup>+/+</sup>* or *Aicda<sup>cre/+</sup> Tgfb1<sup>f/f</sup>* animals (C and D) stained as in Fig. 2. Scale bars: 500  $\mu$ m in low-power images and 125  $\mu$ m in insets.

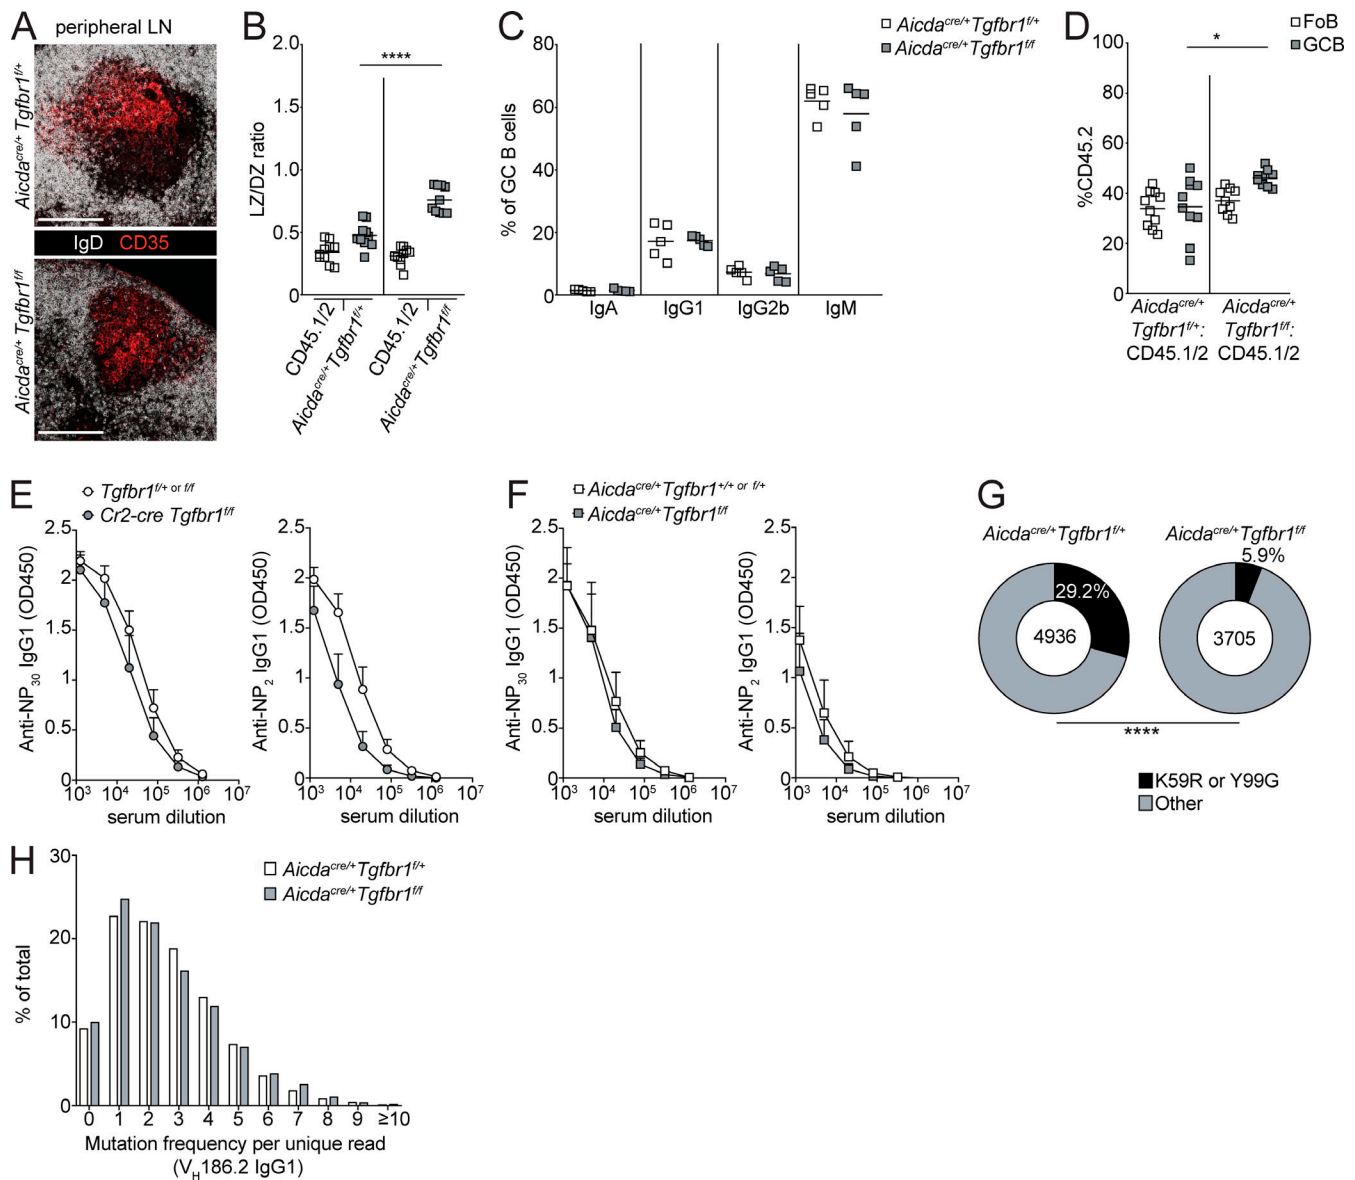

Figure S2. **TGF $\beta$  signaling promotes the LZ to DZ transition and antibody affinity maturation in nonmucosal GCs.** (A) Confocal microscopy of pLNs from NP-CGG-immunized *Aicda*<sup>cre/+</sup> *Tgfb1*<sup>fl/+</sup> or *Aicda*<sup>cre/+</sup> *Tgfb1*<sup>fl/fl</sup> animals stained for IgD (white) and CD35 (red). Scale bars: 150  $\mu$ m. Data are representative of at least three GCs of each type from three independent experiments. (B–D) Ratio of LZ to DZ GCBs (D); percentages of CD45.2<sup>+</sup> GCBs staining positive for IgA, IgG1, IgG2b, or IgM (E); or frequency of FoBs or GCBs derived from CD45.2 bone marrow from mixed bone marrow chimeras generated with a mixture of 70% WT (CD45.1/2) and 30% CD45.2 bone marrow that was *Aicda*<sup>cre/+</sup> *Tgfb1*<sup>fl/+</sup> or *Aicda*<sup>cre/+</sup> *Tgfb1*<sup>fl/fl</sup> assessed by FACS. Data are from one (C) or two (B and D) independent experiments with five mice per group. (E and F) ELISA of total IgG1 binding to NP (NP<sub>30</sub>) or high-affinity IgG1 binding to NP (NP<sub>2</sub>) in serum of littermate control or *Cr2-cre Tgfb1*<sup>fl/fl</sup> (E) or *Aicda*<sup>cre/+</sup> *Tgfb1*<sup>fl/+</sup> or *Aicda*<sup>cre/+</sup> *Tgfb1*<sup>fl/fl</sup> (F) animals that had been immunized 14 d prior with NP-CGG in alum. Data are means + SD. Data in E are from one experiment representative of two with five mice per group. Data in F are from one experiment representative of three independent experiments with seven and eight mice per group, respectively. (G and H) Frequency of K59R or Y99G mutations (G) or overall mutation frequency (H) in unique V<sub>H</sub>186.2 IgG1 sequences with two or more reads from heavy-chain repertoire sequencing of pLN GCBs from NP-CGG-immunized *Aicda*<sup>cre/+</sup> *Tgfb1*<sup>fl/+</sup> or *Aicda*<sup>cre/+</sup> *Tgfb1*<sup>fl/fl</sup> animals. Data are pooled from three mice per group from one experiment. \*, P < 0.05; \*\*\*\*, P < 0.0001; unpaired two-tailed Student's t test for data in A–F. \*\*\*\*, P < 0.0001;  $\chi^2$  test for G.

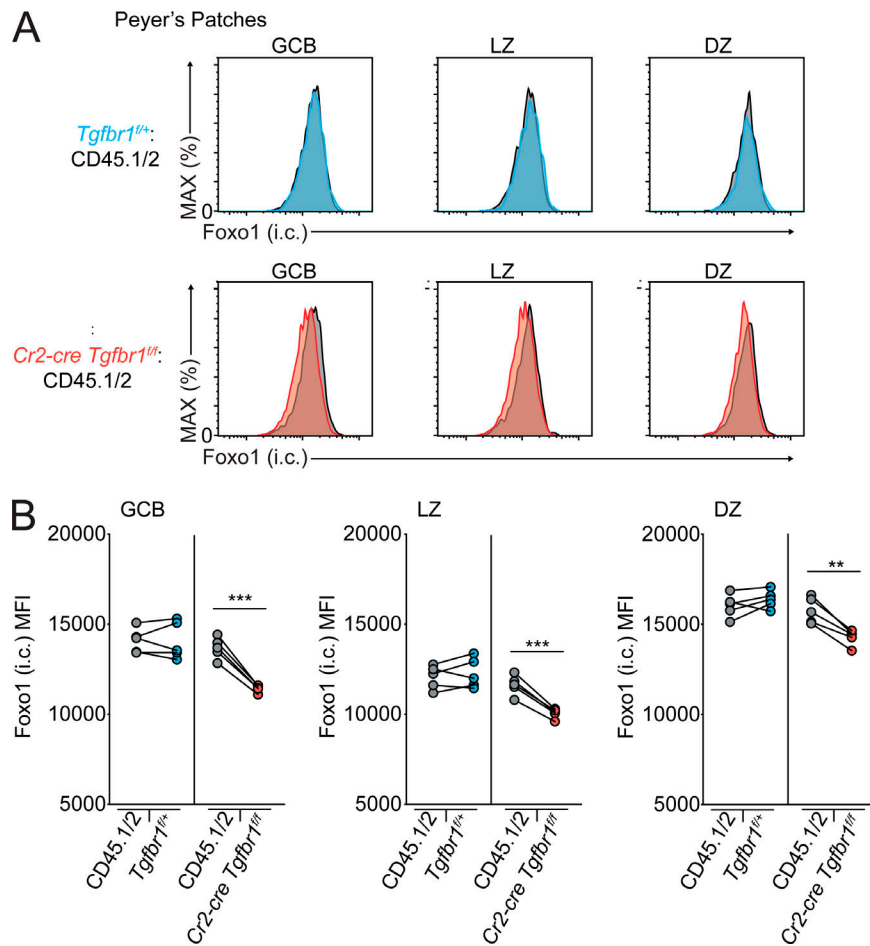

Figure S3. **TGF $\beta$  signaling promotes the transition from the LZ to DZ via Foxo1.** (A and B) Intracellular FACS of Foxo1 in total (left), LZ (middle), and DZ (right) GCBs from PPs of mixed chimeras generated with 30% CD45.2 bone marrow *Tgfbr1<sup>fl/fl</sup>* (blue) or *Cr2-cre Tgfbr1<sup>fl/fl</sup>* (red) and 70% WT CD45.1/2 (gray) bone marrow. Representative histograms are shown in A, and mean fluorescence intensity is shown in B. Data in B are from five mice of each type from one experiment representative of two independent experiments. \*\*,  $P < 0.01$ ; \*\*\*,  $P < 0.001$ ; paired two-tailed Student's  $t$  test. MAX, maximum.
